# Supplementary material
Source: publisher site journal article supplement (https://www.spandidos-publications.com/7532/downloadSupplementary)
Supplement: Supplementary file 1 [file downloadSupplementary]

## Sheet: Sheet1
Table SII. Top 30 genes with the highest differential expression between EO-GC and L-GC.
Gene	log2FoldChange	P-adjusted	Status
KRT6C	-5.29769	7.76x10-09	downregulated in EO-GC
KRT4	-4.86784	3.41x10-08	downregulated in EO-GC
CLDN6	-3.84487	2.08x10-08	downregulated in EO-GC
PNMA5	-3.32524	4.87x10-06	downregulated in EO-GC
ACTL8	-3.19337	4.87x10-06	downregulated in EO-GC
HOXD10	-3.14365	4.87x10-06	downregulated in EO-GC
HORMAD1	-2.63898	3.52x10-06	downregulated in EO-GC
MIOX	-2.60131	7.67x10-07	downregulated in EO-GC
RPS3AP16	1.3715	6.32x10-07	upregulated in EO-GC
FBXL13	1.3951	1.94x10-10	upregulated in EO-GC
RNLS	1.45567	4.87x10-06	upregulated in EO-GC
UTS2B	1.56372	6.82x10-06	upregulated in EO-GC
CKMT2	1.6404	9.35x10-06	upregulated in EO-GC
AP003721.1	1.71656	4.07x10-07	upregulated in EO-GC
MAGEL2	1.78632	4.87x10-06	upregulated in EO-GC
LINC02363	1.91688	2.60x10-11	upregulated in EO-GC
KLHL4	2.08434	3.48x10-09	upregulated in EO-GC
MGARP	2.1481	7.82x10-10	upregulated in EO-GC
AC093583.1	2.15419	1.20x10-07	upregulated in EO-GC
WT1-AS	2.17864	9.21x10-06	upregulated in EO-GC
PLIN1	2.2407	9.35x10-06	upregulated in EO-GC
ATP2B3	2.29536	1.84x10-06	upregulated in EO-GC
AC069029.1	2.53215	1.20x10-07	upregulated in EO-GC
CYP8B1	2.57172	1.94x10-10	upregulated in EO-GC
AC004947.1	2.64808	1.67x10-08	upregulated in EO-GC
ADAMTS16	2.68667	1.48x10-12	upregulated in EO-GC
WT1	2.74592	4.07x10-07	upregulated in EO-GC
ALDH1A2	2.92779	4.06x10-13	upregulated in EO-GC
KCNJ16	2.98471	1.48x10-07	upregulated in EO-GC
CLEC3A	3.02082	4.02x10-06	upregulated in EO-GC
In red, upregulated genes in EO-GC with survival association; in blue, downregulated genes in EO-GC with survival association. EO-GC, early-onset gastric cancer; L-GC, late-onset GC.
